# Supplementary material for: Systematic Identification of the RNA-Binding Protein STAU2 as a Key Regulator of Pancreatic Adenocarcinoma
Source: MDPI journal article supplement (doi:10.3390/cancers14153629), 2022-07-26
Supplement: s1 [file s1]

# Supplementary Materials: Systematic Identification of the RNA-Binding Protein STAU2 as a Key Regulator of Pancreatic Adenocarcinoma

Xiao Wang, Wenbin Kuang, Jiayu Ding, Jiaxing Li, Minghui Ji, Weijiao Chen, Hao Shen, Zhongrui Shi, Dawei Wang, Liping Wang and Peng Yang

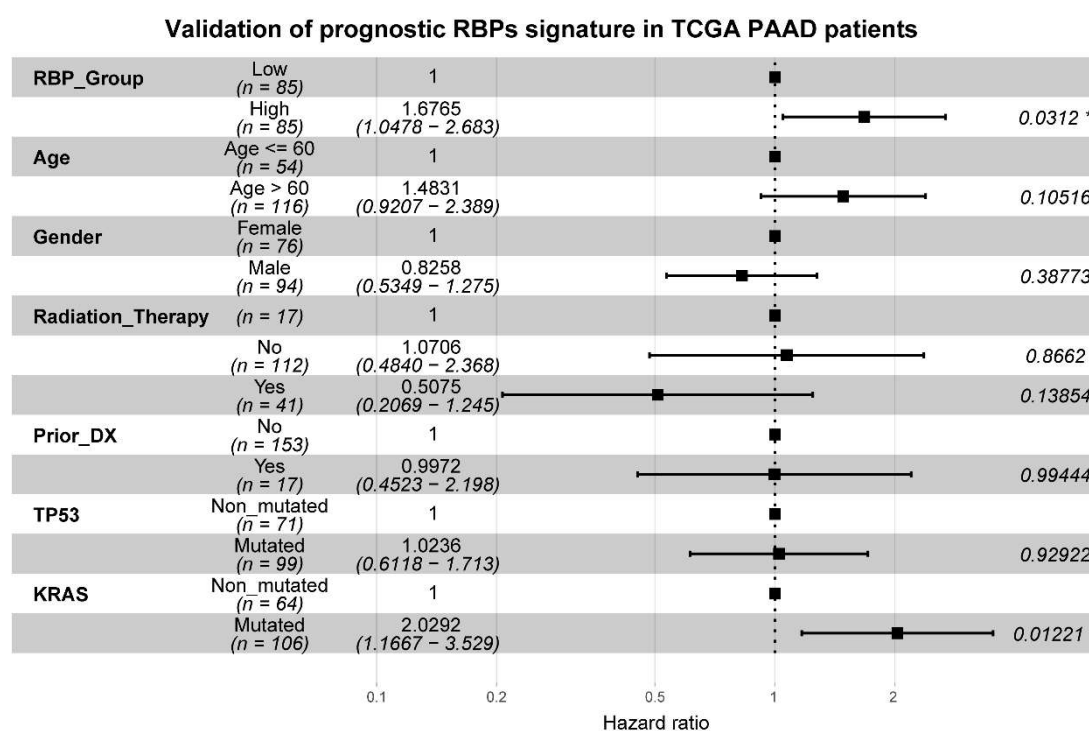

# Events: 88; Global p-value (Log-Rank): 0.00024332

AIC: 761.94; Concordance Index: 0.68

**Figure S1.** Validation of prognostic RBPs signature in TCGA PAAD patients. Forest plots showing the prognostic values of RBPs signature in multivariate cox regression analysis in TCGA dataset. \* $p < 0.05$ .

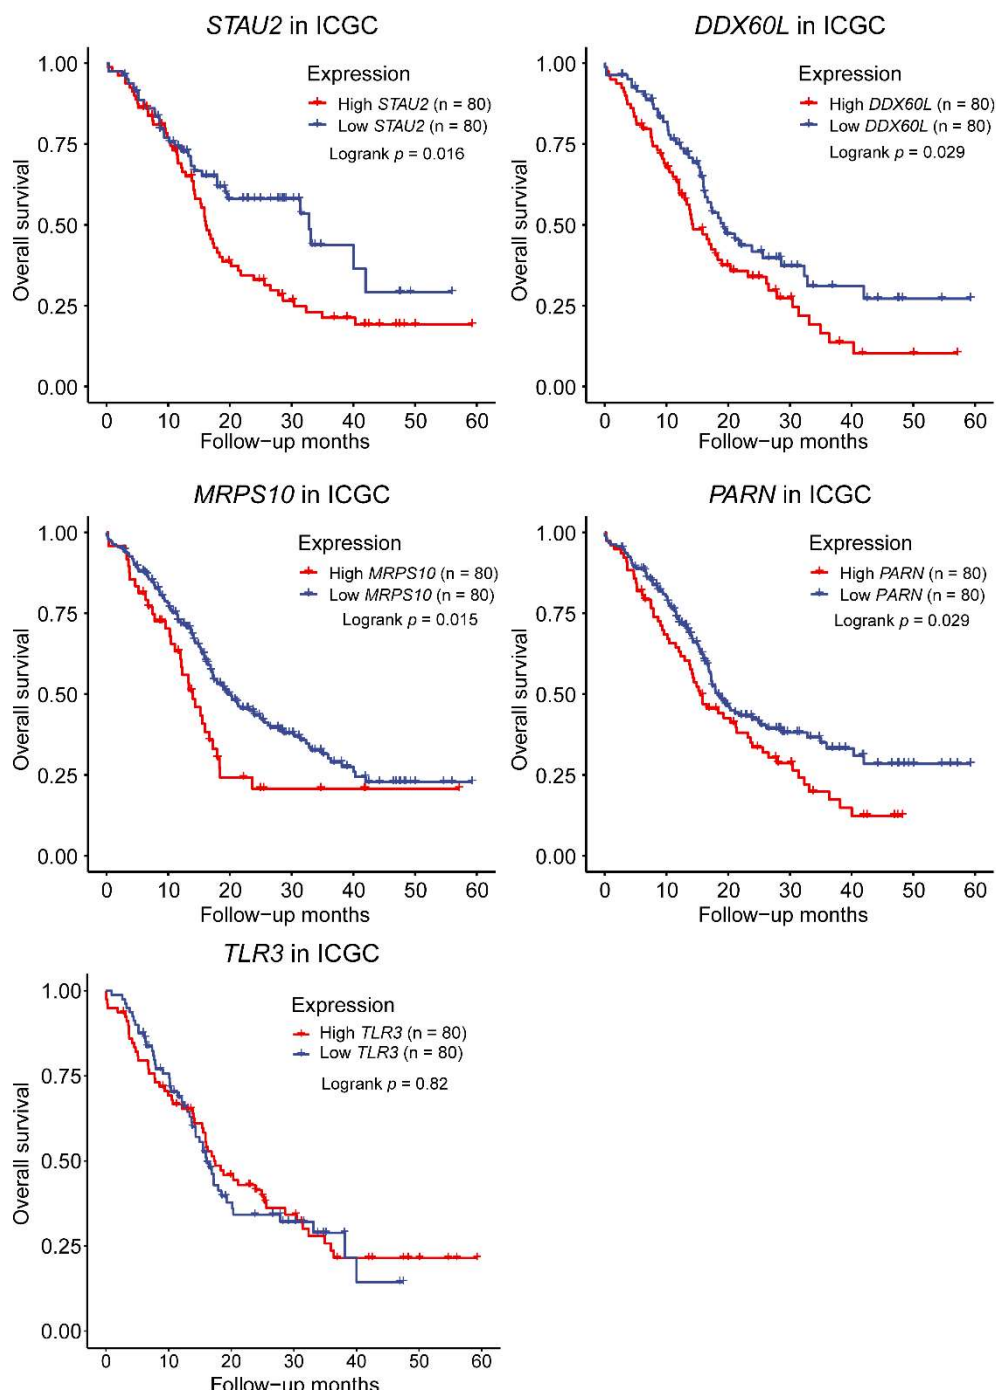

**Figure S2.** Validation of prognostic RBPs-hub signature in ICGC PAAD patients. Kaplan-Meier plot showing the relationship between mRNA expression of RBPs-hub signature and overall survival of ICGC PAAD patients.

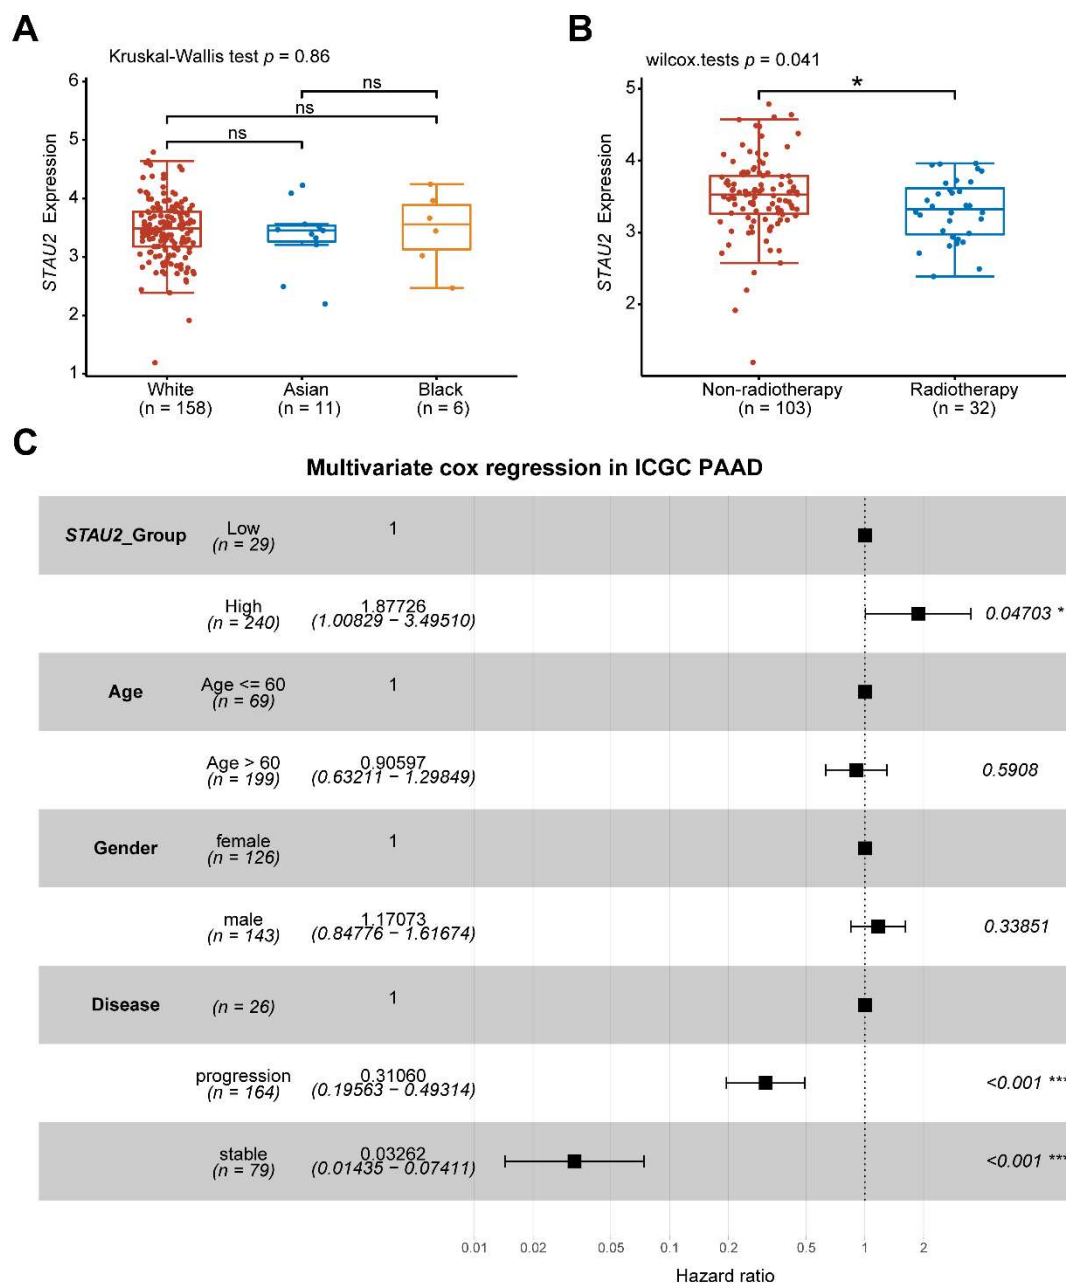

**Figure S3.** Geographic and clinical features specificity of STAU2 and validation of prognostic STAU2 in ICGC PAAD patients. **(A)** Differential expression of STAU2 in white, Asian and black pancreatic cancer patients. ns,  $p > 0.05$ . **(B)** Expression difference of STAU2 between pancreatic cancer patients with and without radiation therapy \* $p < 0.05$ . **(C)** Forest plots showing the prognostic values of STAU2 signature in multivariate cox regression analysis in ICGC dataset. \* $p < 0.05$ , \*\*\* $p < 0.001$ .

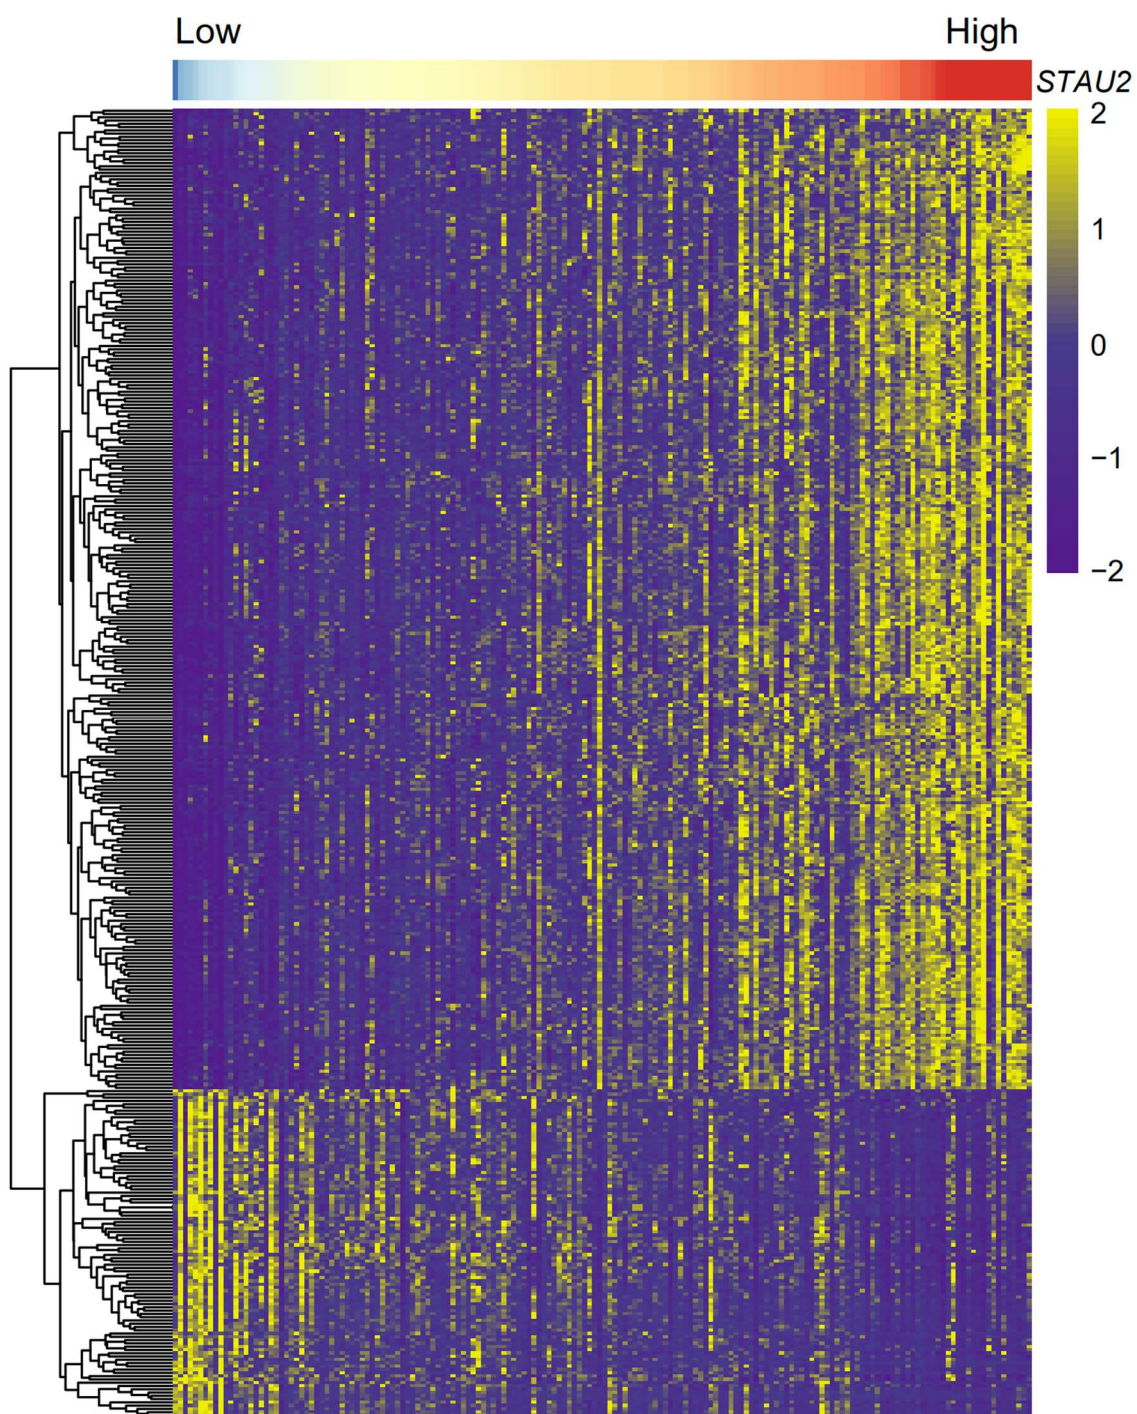

**Figure S4.** Heatmaps to show the expression patterns of *STAU2*-correlated genes.

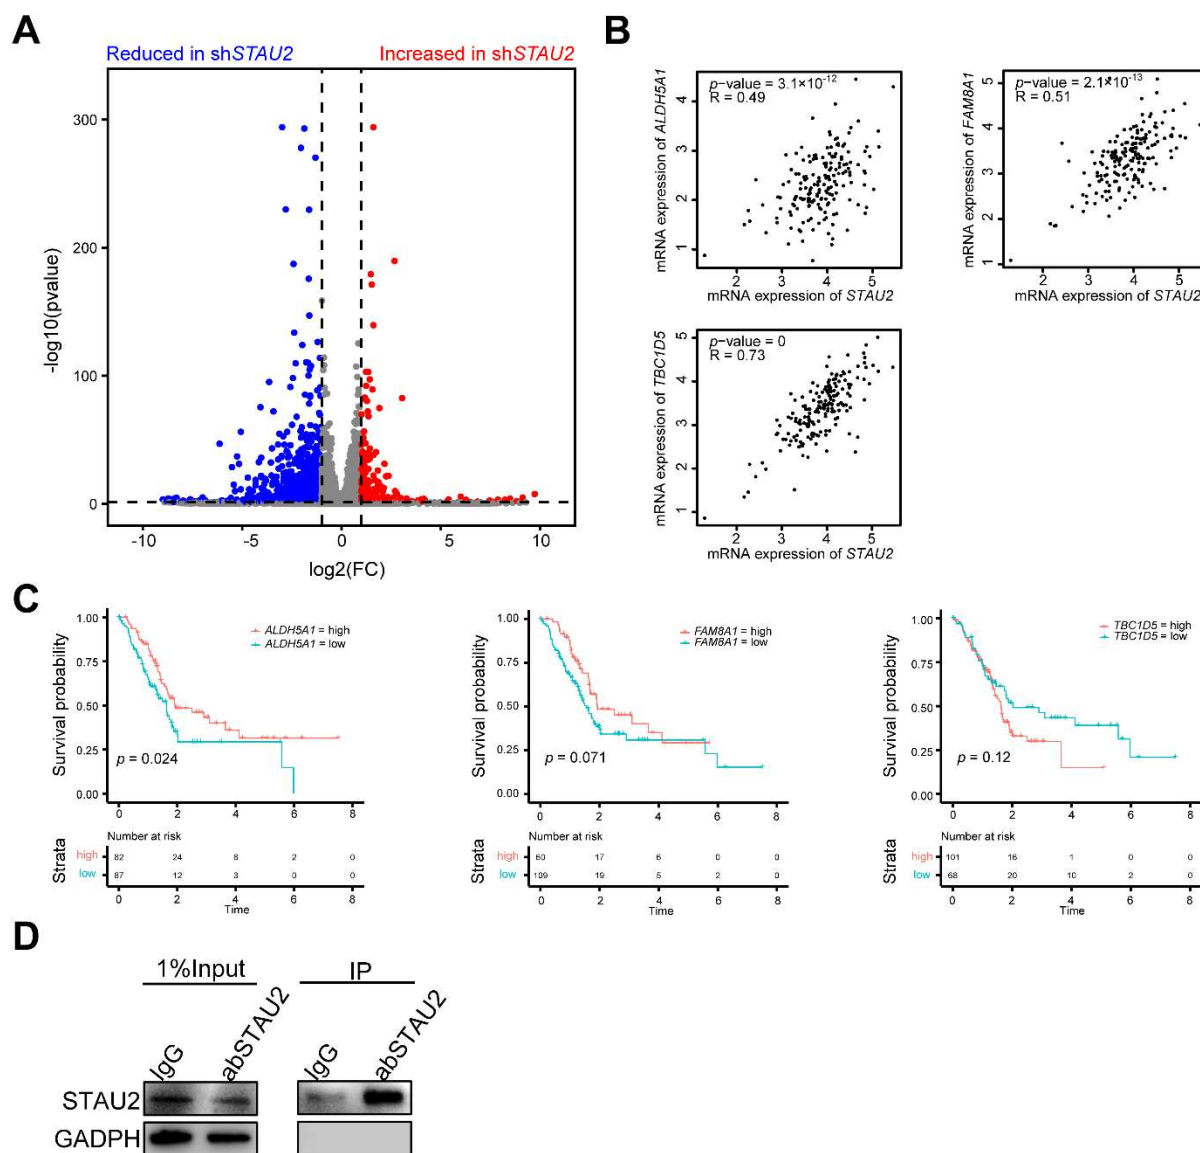

**Figure S5.** Validation and analysis of *STAU2* associated genes. **(A)** Genes expression of RNA sequence in shNC and sh*STAU2* PANC-1 cells. **(B)** Scatter plots to show the correlation between *STAU2* and *STAU2*-target genes. **(C)** Kaplan-Meier plot showing the relationship between expression levels of *STAU2*-target genes and overall survival of TCGA-PAAD patients. **(D)** IP analysis of protein extracts from PANC-1 cells. IP was performed with a *STAU2* antibody, followed by WB analysis of *STAU2* pulldown products using *STAU2* and GAPDH antibodies. The uncropped Western Blot images can be found in Figure S10.



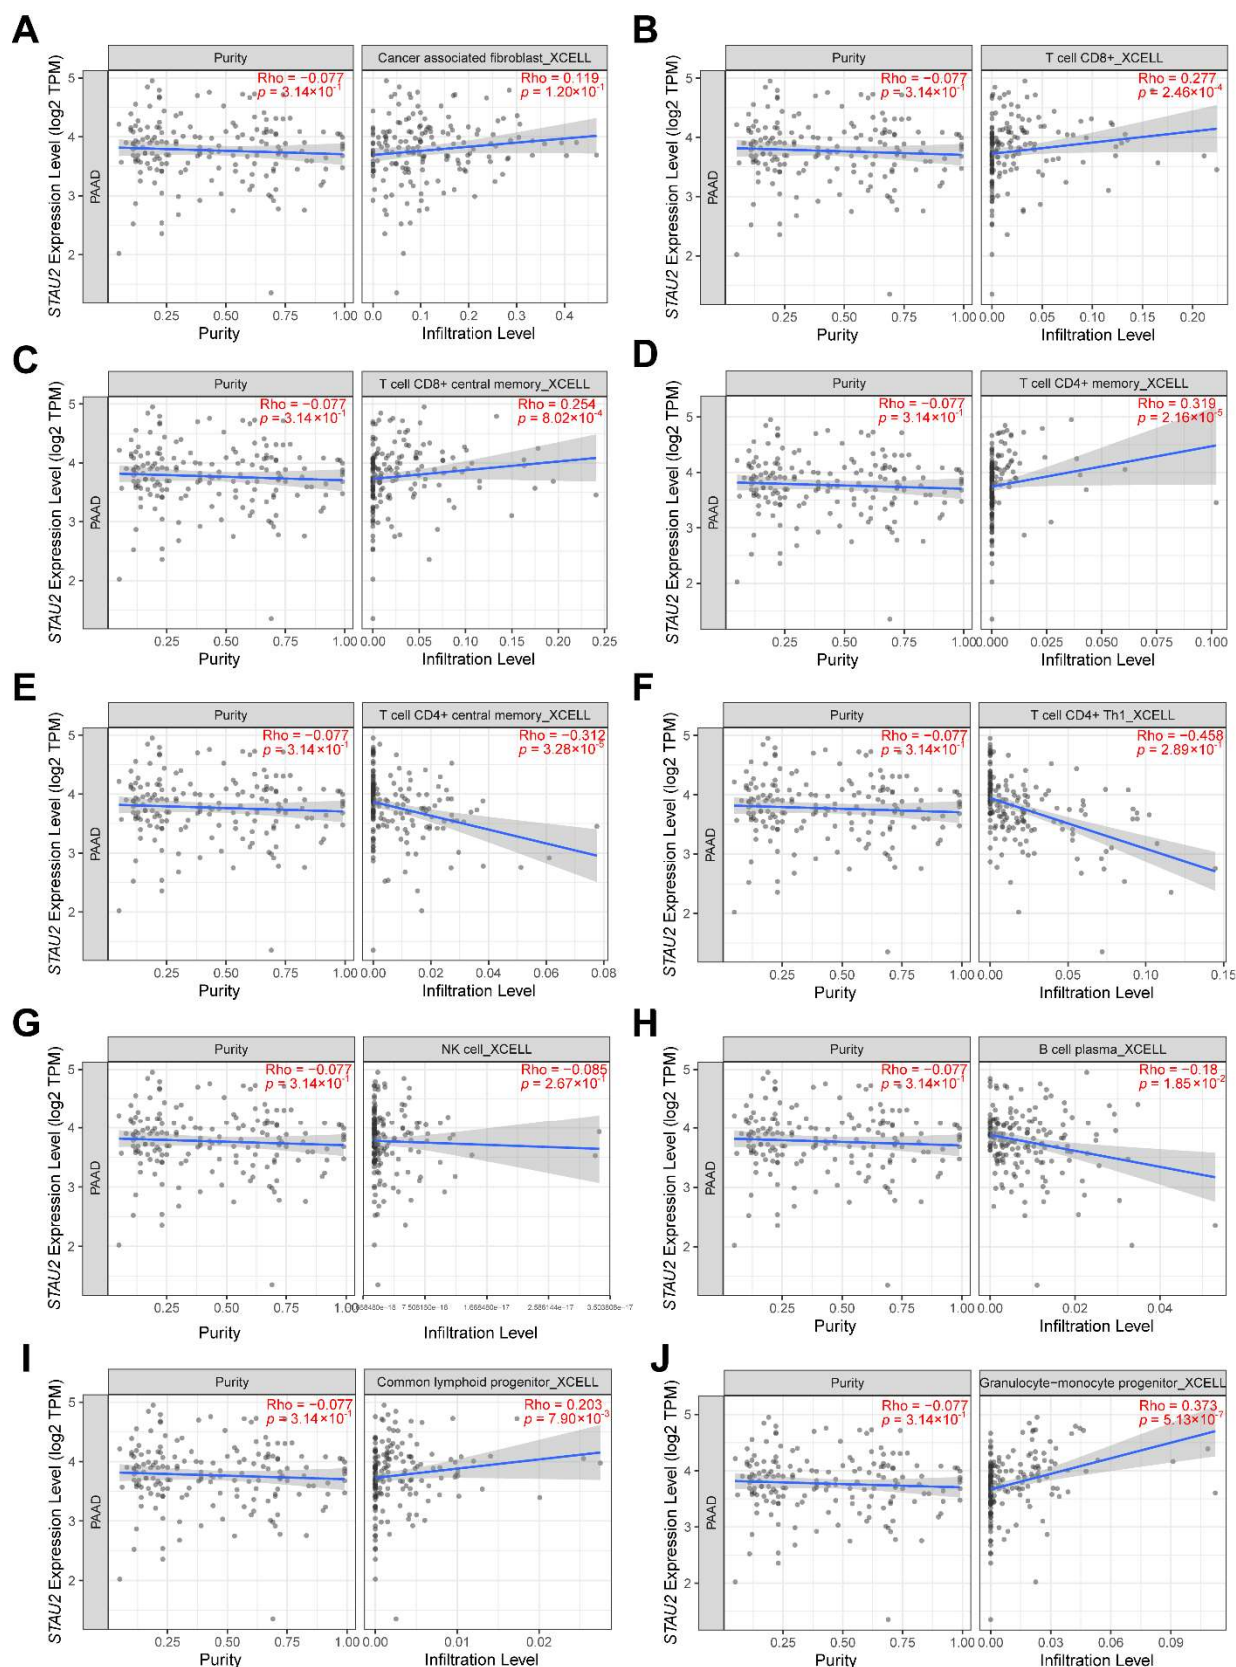

**Figure S6.** The association between *STAU2* expression and immune infiltration in PAAD patients. The relationship between mRNA expression levels of *STAU2* and immune infiltration levels of cancer associated fibroblast, CD8+ T-cells, CD8+ central memory T-cells, CD4+ memory T-cells, memory CD4+ central memory T-cells, Th1 CD4+ T-cells, NK T-cell, plasma B-cells, common lymphoid progenitor, granulocyte-monocyte progenitors presented by scatter plots.

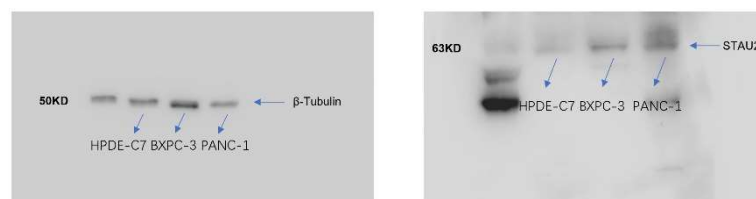

**Figure S7.** Uncropped Western Blot images for Figure 4F.

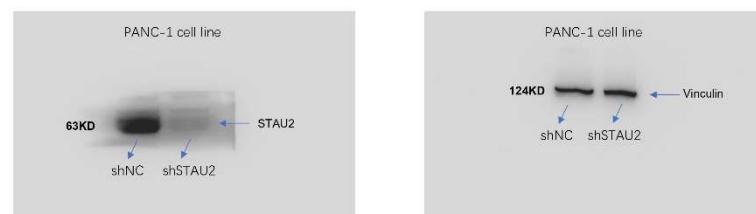

**Figure S8.** Uncropped Western Blot images for Figure 5A.

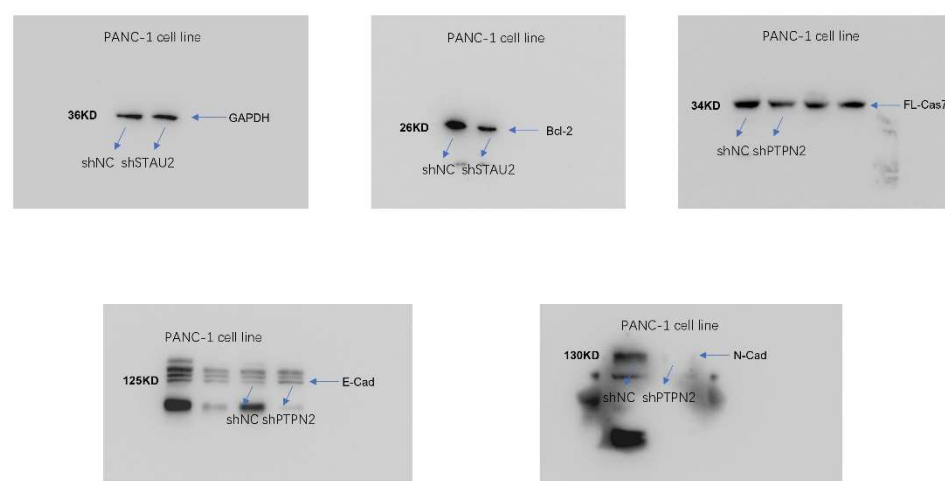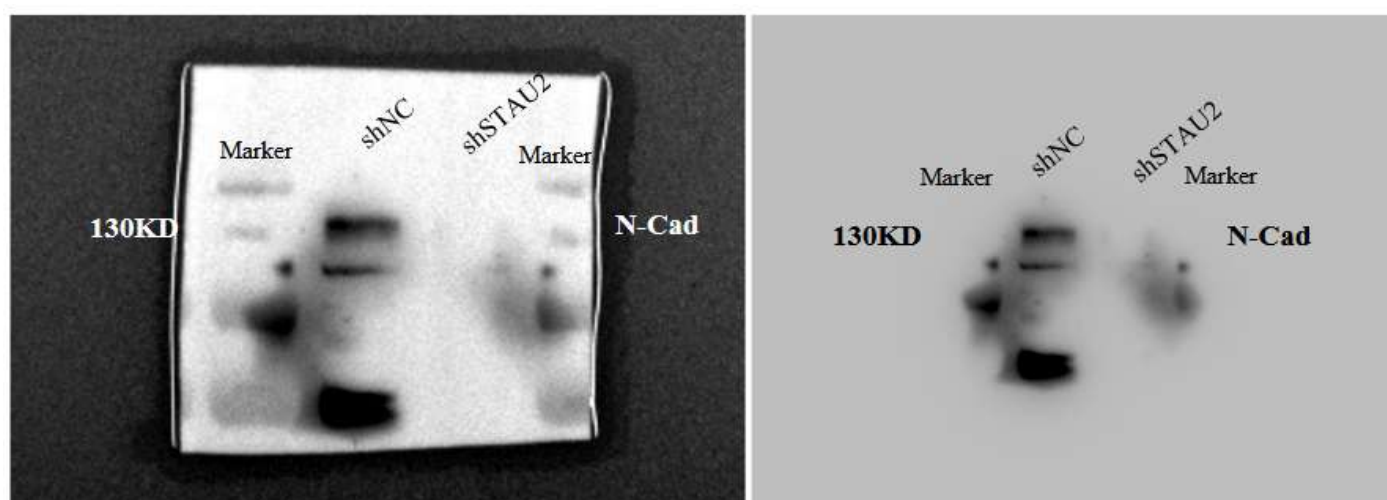

**Figure S9.** Uncropped Western Blot images for Figure 5F.

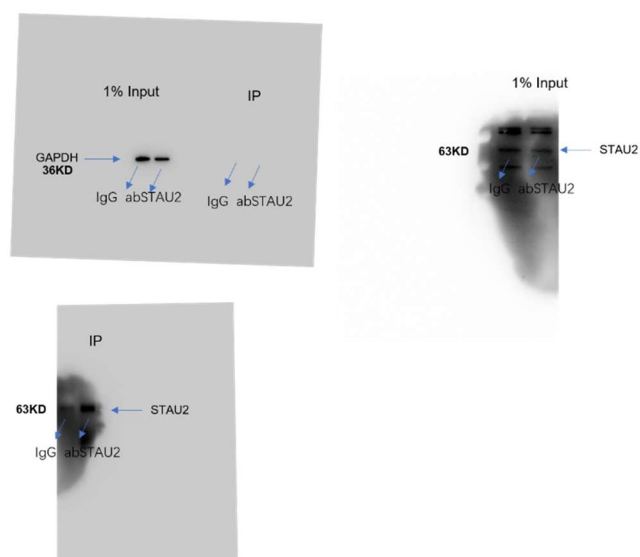

**Figure S10.** Uncropped Western Blot images for Figure S5D.



**Table S1.** Primer sequences for genes in RT-qPCR.

| Name           | Sense (5'–3')            | Antisense (5'–3')          |
|----------------|--------------------------|----------------------------|
| <i>STAU2</i>   | GCTCTGAAGCGAAATATGCCTGTC | TTTAAGCTCCTGTAAGACGGTGGTCG |
| <i>PALLD</i>   | GCCTACTTTCCTCCTGTTTT     | AGTGGTCATTGTTGGATTCTC      |
| <i>HNRNPU</i>  | GGCGGGAGGTAAGAAGAAGG     | CAGGTGGCTGAGGAGATTG        |
| <i>SERBP1</i>  | GTGACTGAGGAAACACCTGAA    | AGCCTTCCACTCATCCAAAG       |
| <i>DDX3X</i>   | TGGAAATAGTCGCTGGTGTG     | GGAGGACAGTTGTTGCCTGT       |
| <i>β-actin</i> | CACCATTGGCAATGAGCGGTTTC  | AGGTCTTTGCGGATGTCCACGT     |

**Table S2.** Antibody information in Western Blot.

| Name       | Source | Dilution | Manufacturer | Catalog Number |
|------------|--------|----------|--------------|----------------|
| β-tubulin  | Rabbit | 1:5000   | Share-bio    | AB0039         |
| STAU2      | Rabbit | 1:1000   | proteintech  | 15998-1-AP     |
| Vinculin   | Rabbit | 1:1000   | proteintech  | 26520-1-AP     |
| GAPDH      | Mouse  | 1:5000   | proteintech  | 60004-1-Ig     |
| BCL2       | Rabbit | 1:1000   | proteintech  | 12789-1-AP     |
| Caspase7   | Rabbit | 1:1000   | proteintech  | 27155-1-AP     |
| E-cadherin | Rabbit | 1:1000   | proteintech  | 20874-1-AP     |
| N-cadherin | Rabbit | 1:1000   | proteintech  | 22018-1-AP     |
